# Supplementary material for: Regulation of aging by balancing mitochondrial function and antioxidant levels
Source: PubMed Central journal article supplement (PMC10717039; doi:10.1186/s12576-022-00853-1), 2022-11-15
Supplement: 12576_2022_853_MOESM1_ESM.pdf [file 12576_2022_853_MOESM1_ESM.pdf]

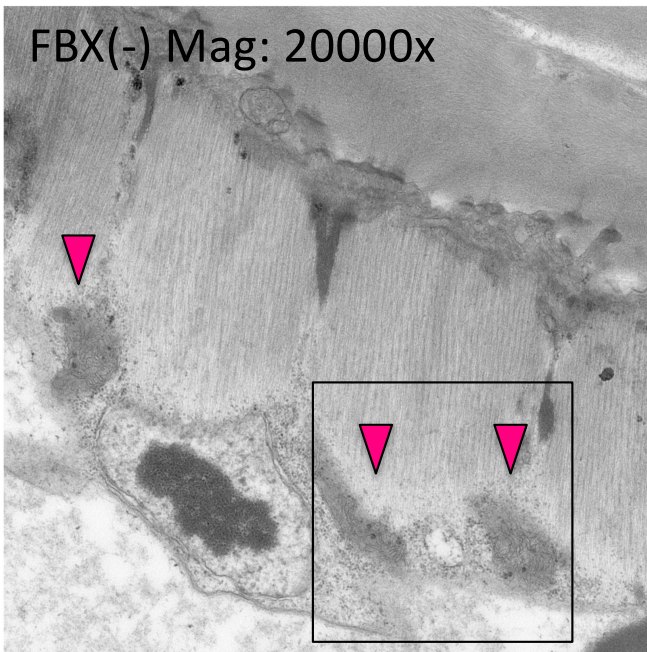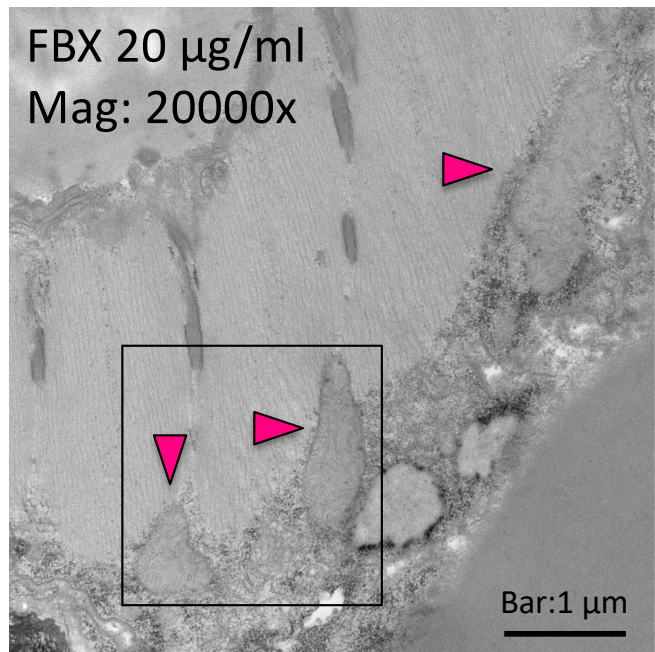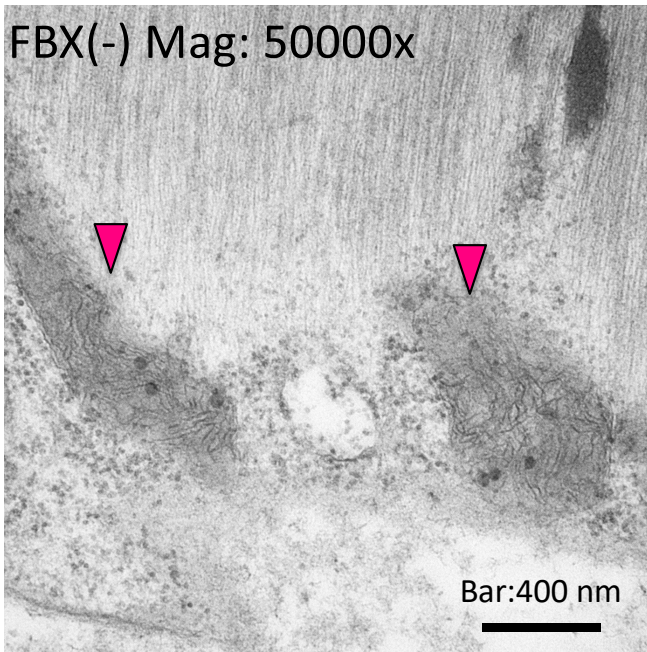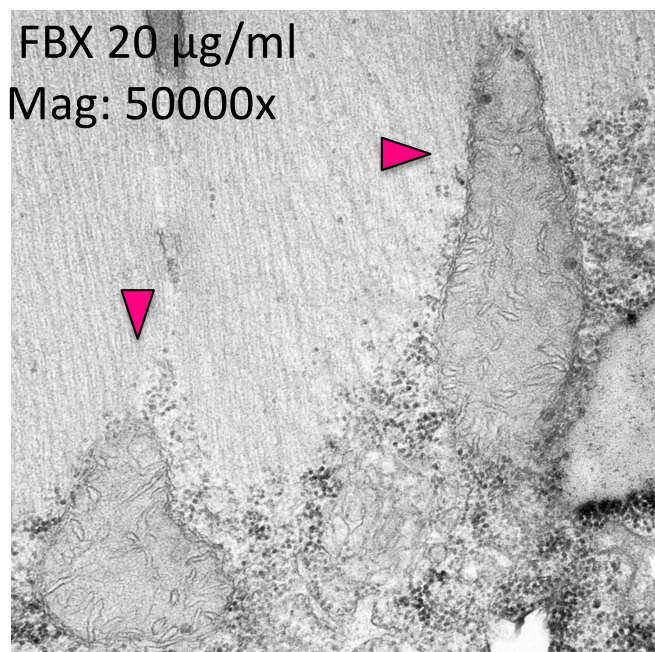

supplementary Fig. 1

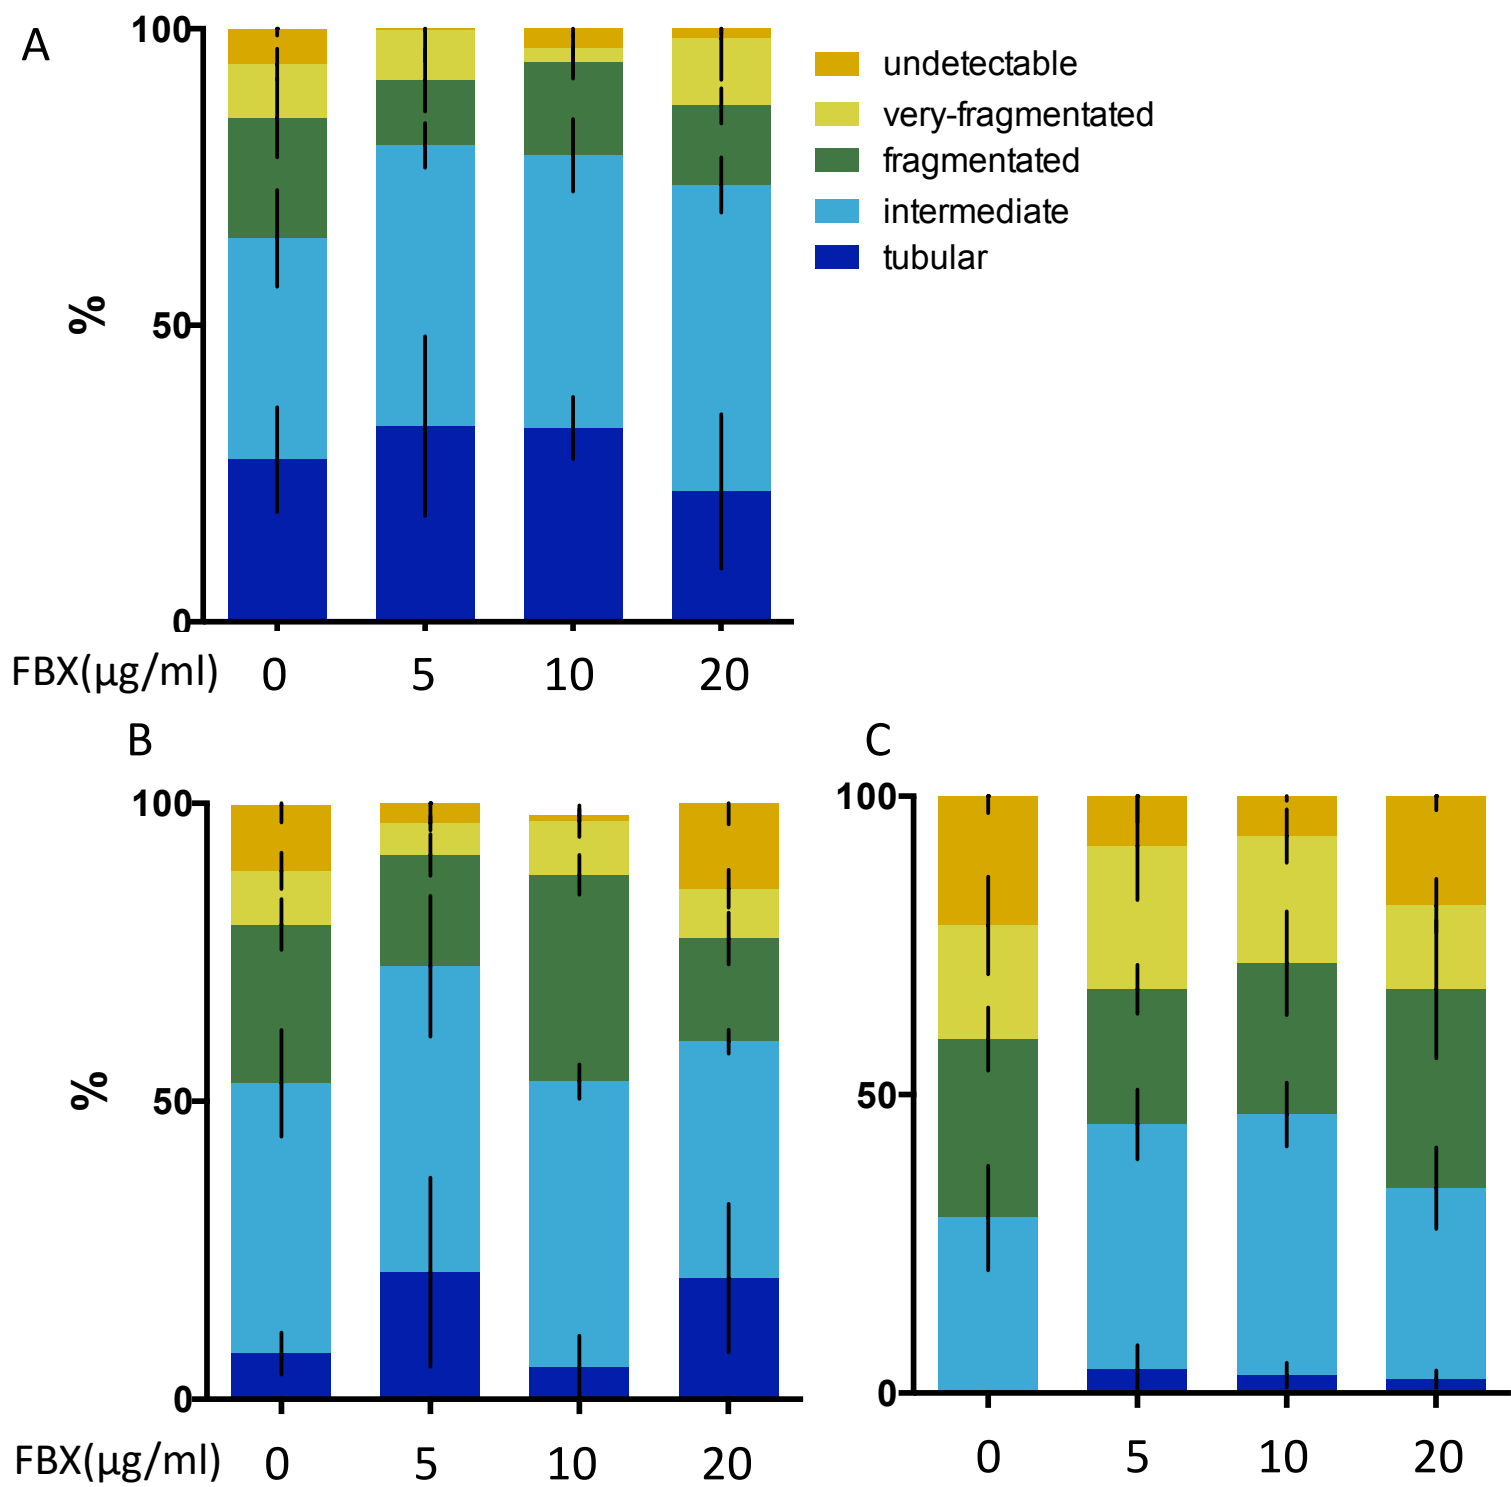

supplementary Fig. 2

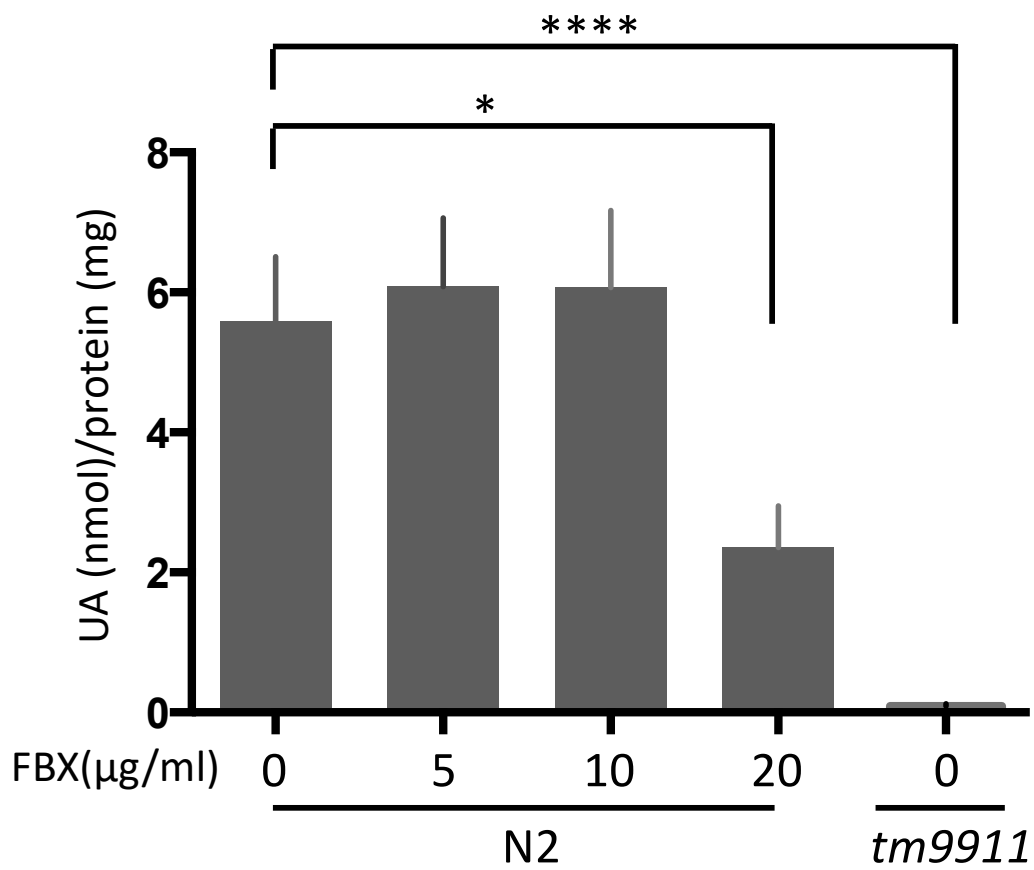

supplementary Fig. 3

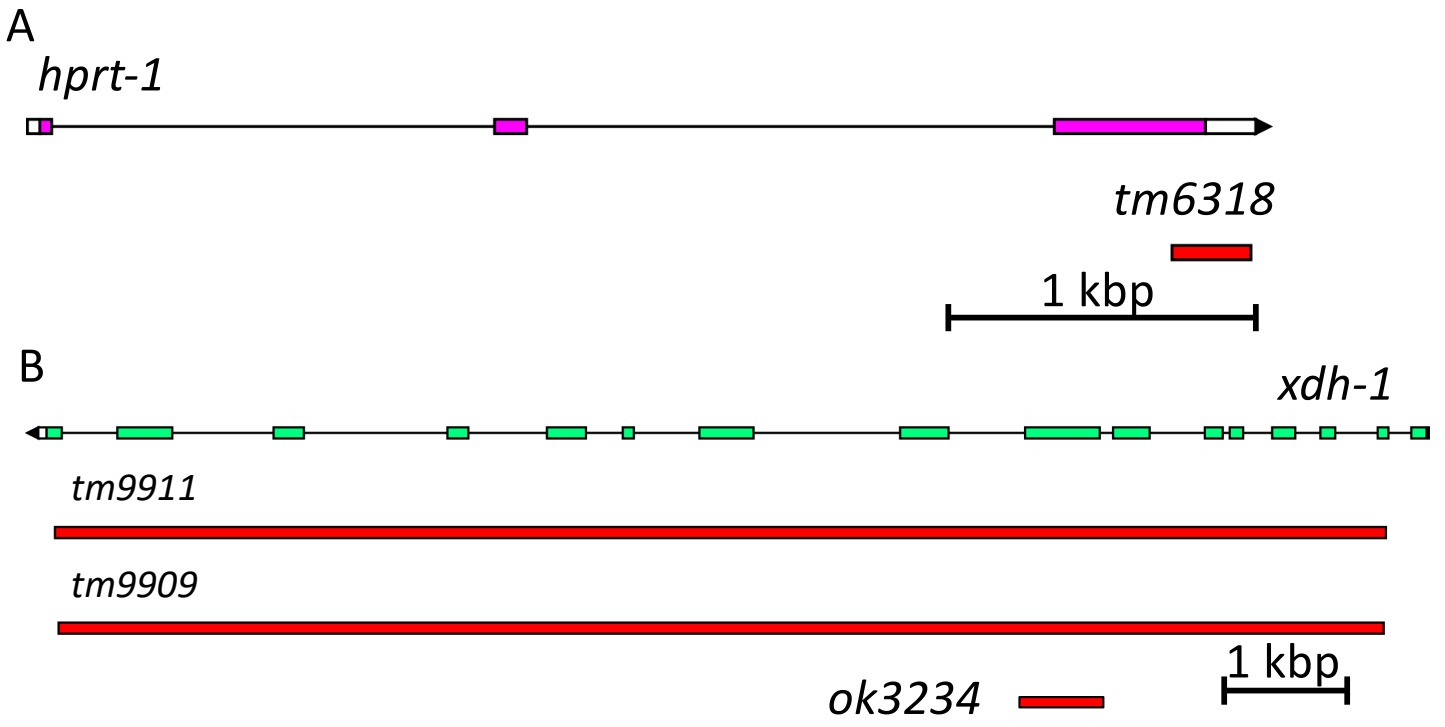

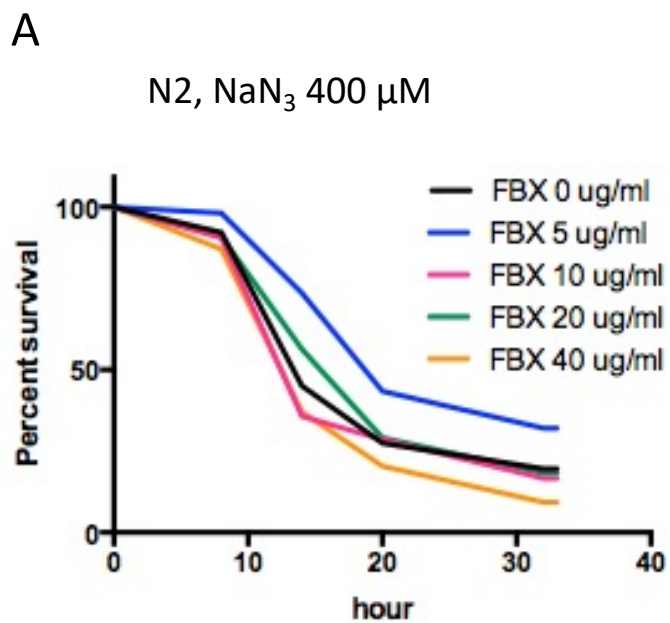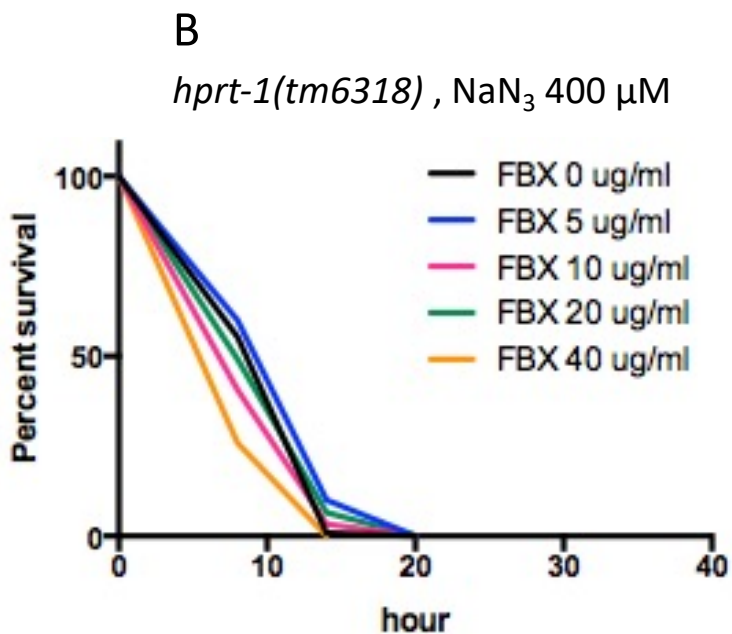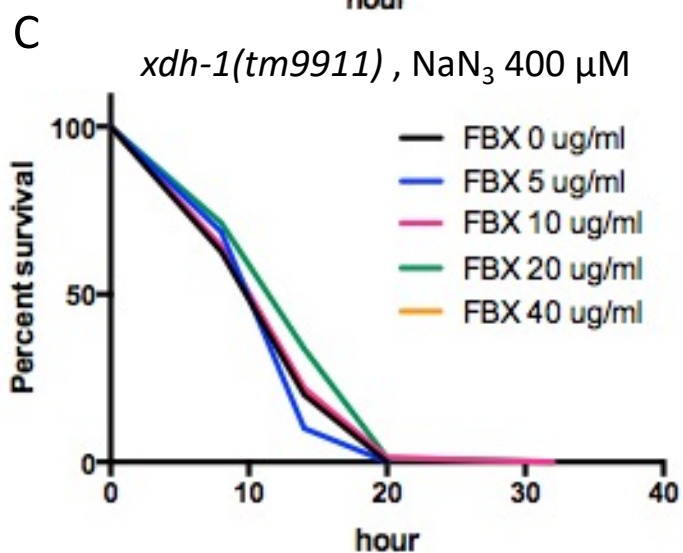



A *xdh-1(tm9909)*,  $\text{NaN}_3$  400  $\mu\text{M}$

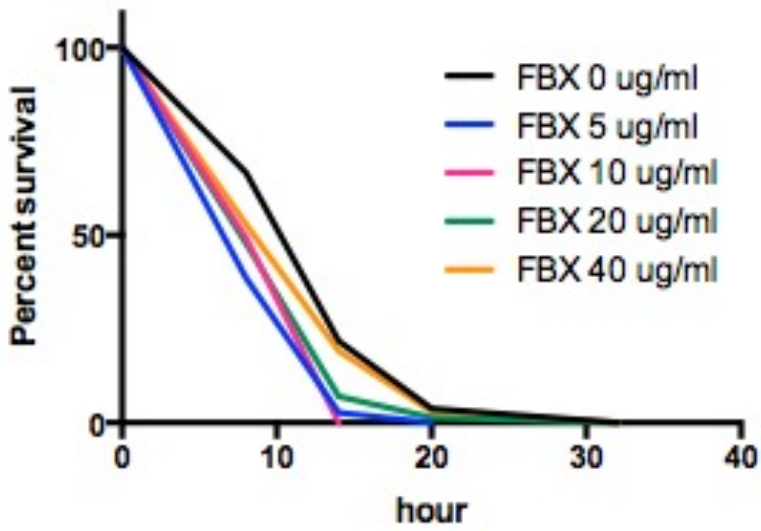

B *xdh-1(tm9909)*,  $\text{NaN}_3$  500  $\mu\text{M}$

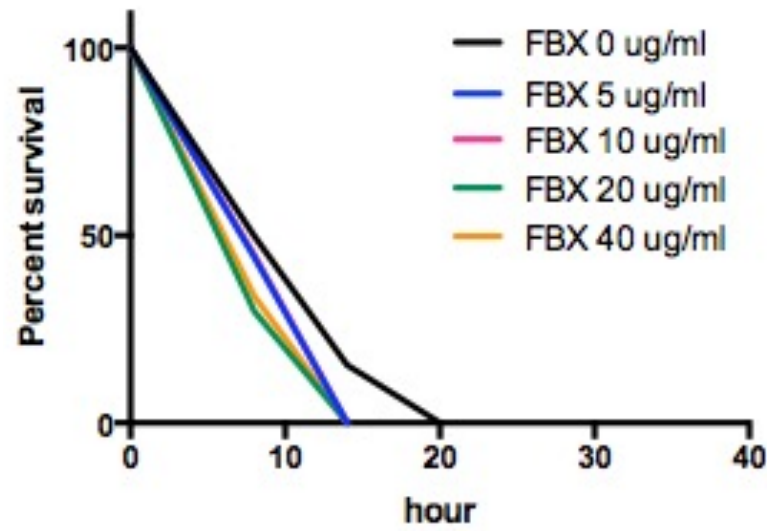

C *xdh-1(ok3234)*,  $\text{NaN}_3$  400  $\mu\text{M}$

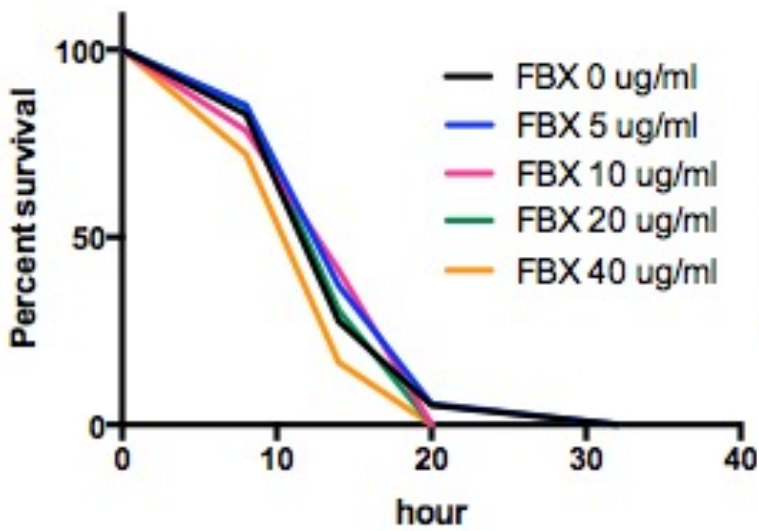

D *xdh-1(ok3234)*,  $\text{NaN}_3$  500  $\mu\text{M}$

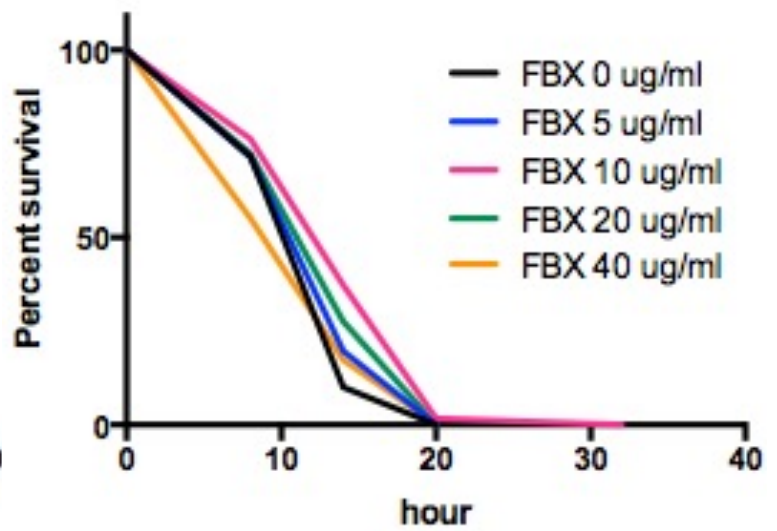

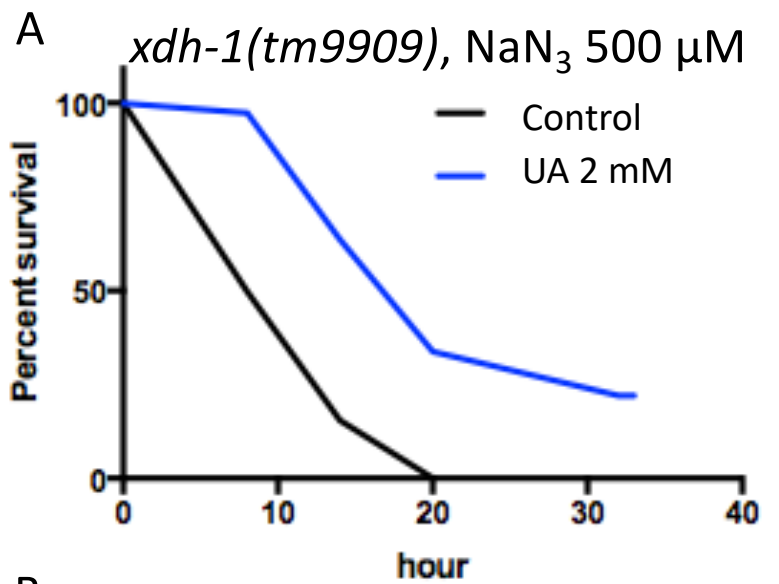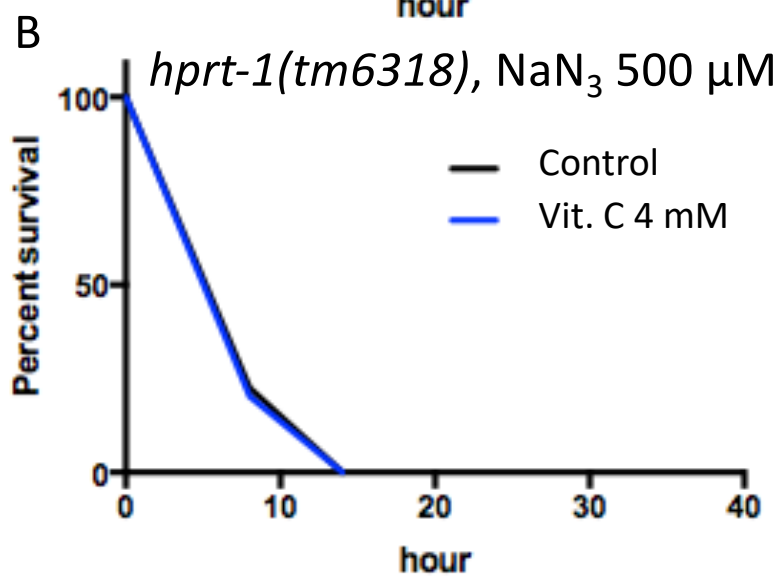

supplementary Fig. 7

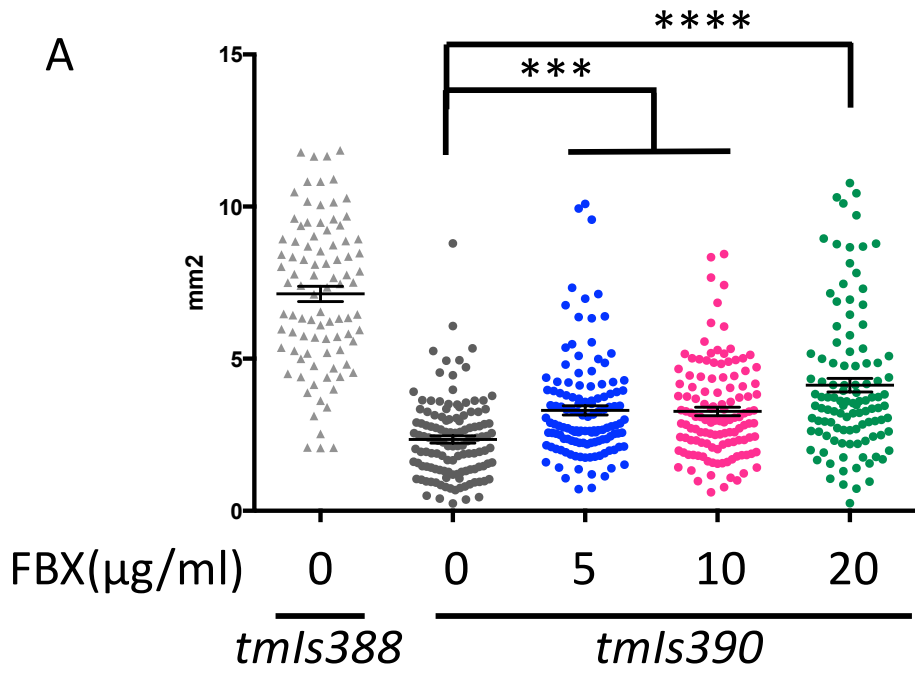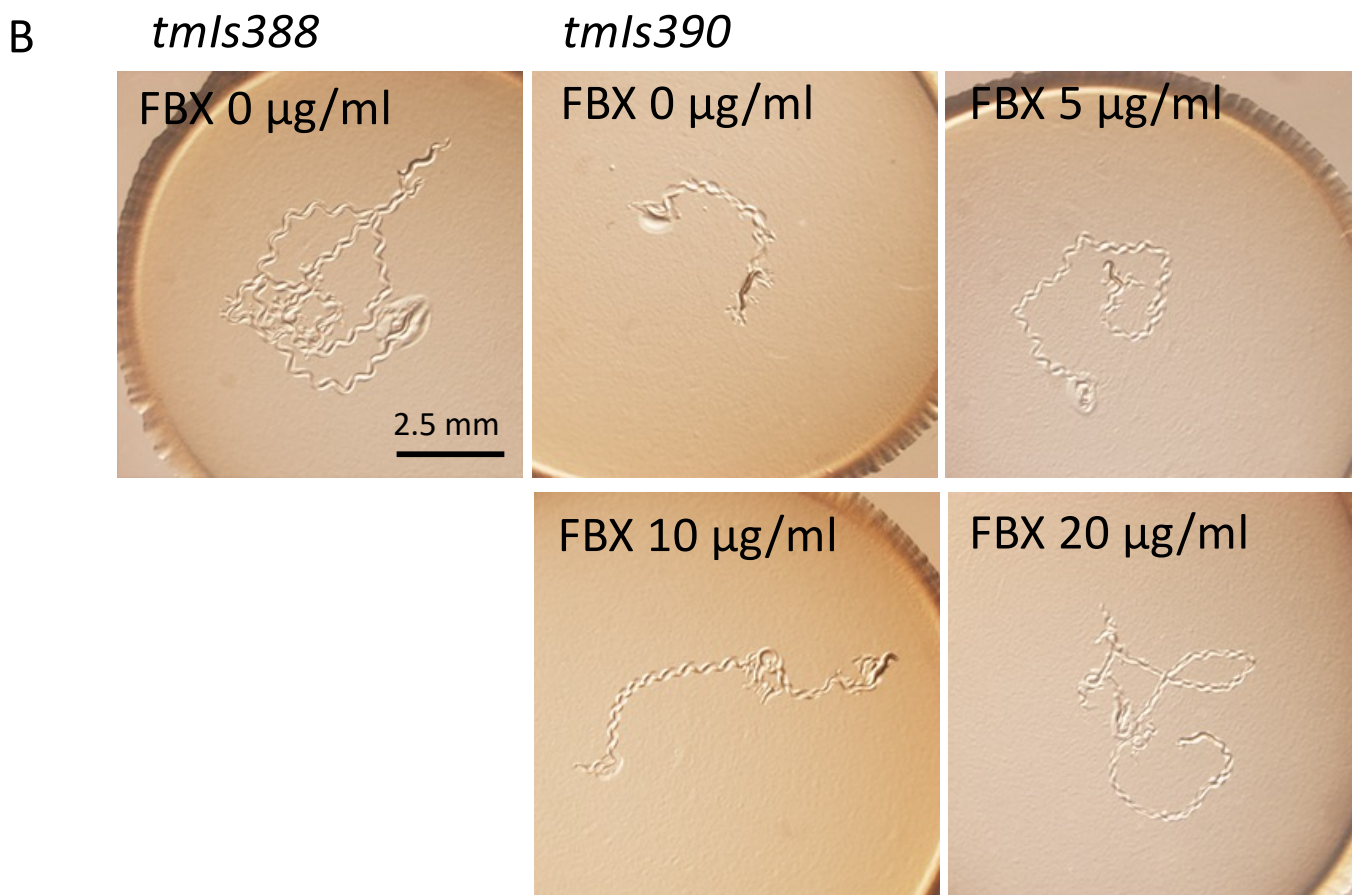

supplementary Fig. 8
